# Supplementary material for: Temperature during larval development and adult maintenance influences the survival of Anopheles gambiae s.s
Source: PubMed Central journal article supplement (PMC4236470; doi:10.1186/s13071-014-0489-3), 2014-11-05

Supplementary figure s4

Gompertz parameters' values with respect to larval and adult environmental temperatures

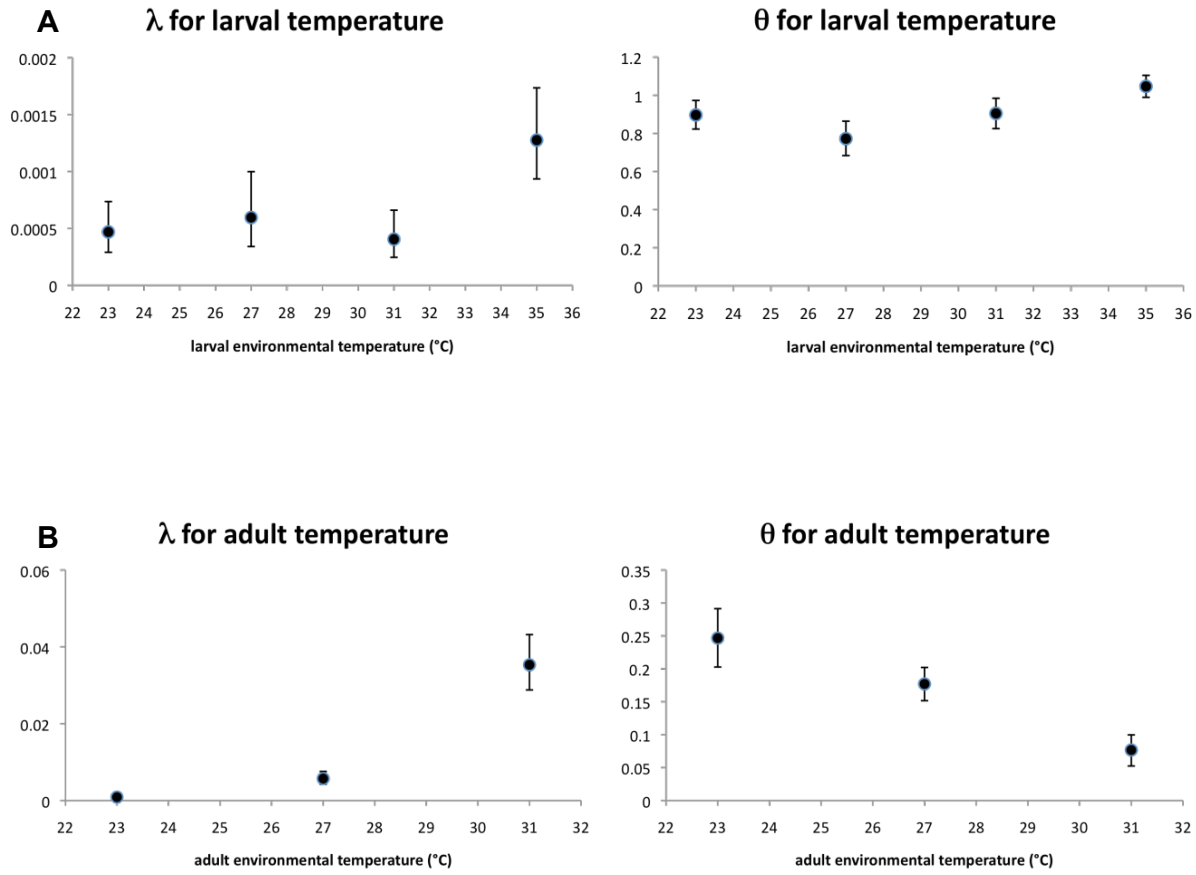

**C**  $\lambda$  at adult temperature 23°C

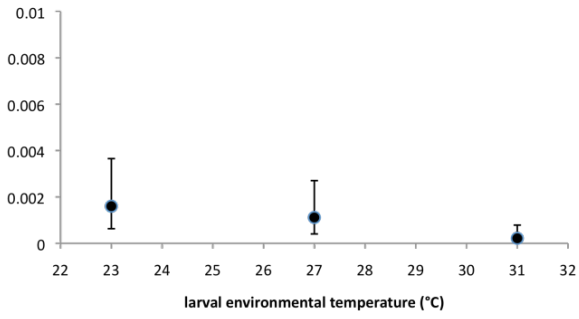

$\theta$  at adult temperature 23°C

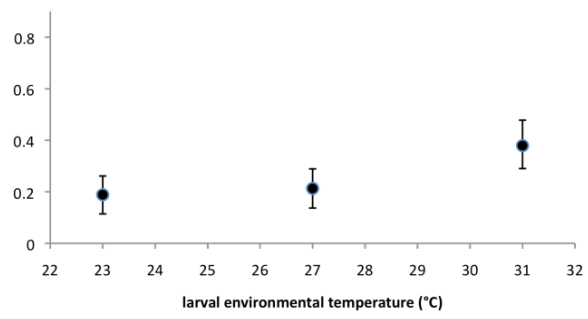

$\lambda$  at adult temperature 27°C

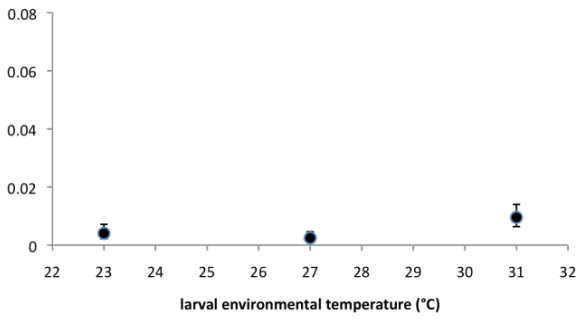

$\theta$  at adult temperature 27°C

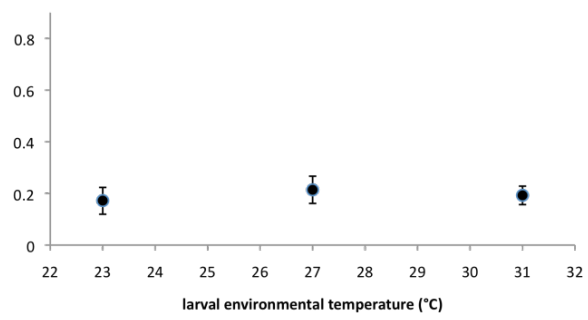

$\lambda$  at adult temperature 31°C

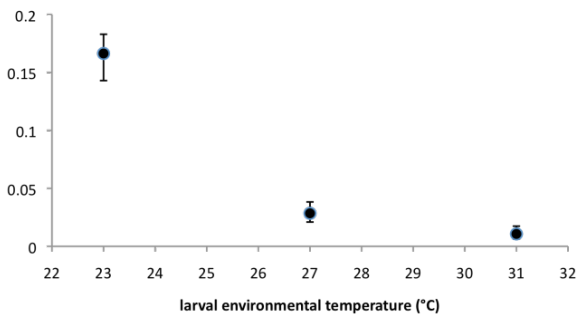

$\theta$  at adult temperature 31°C

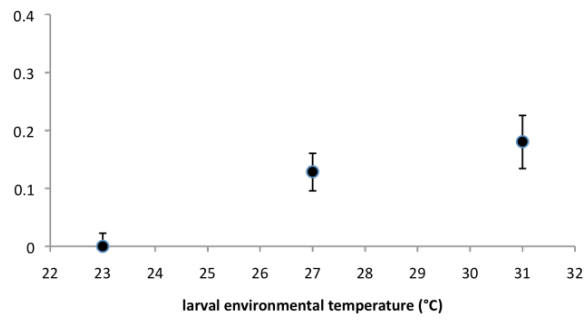

Supplement: 13071_2014_489_MOESM11_ESM.pdf [file 13071_2014_489_MOESM11_ESM.pdf]
